# Supplementary material for: Development of an Integrated Subspecialist Multidisciplinary Neuro-oncology Service
Source: PubMed Central journal article supplement — BMJ Qual Improv Rep. 2013 Aug 21;2(1):u201857.w981. doi: 10.1136/bmjquality.u201857.w981 (PMC4652738; doi:10.1136/bmjquality.u201857.w981), 2013-08-21
Supplement: bmjqir-2-u201857-w981-s1.pdf [file bmjqir-2-u201857-w981-s1.pdf]

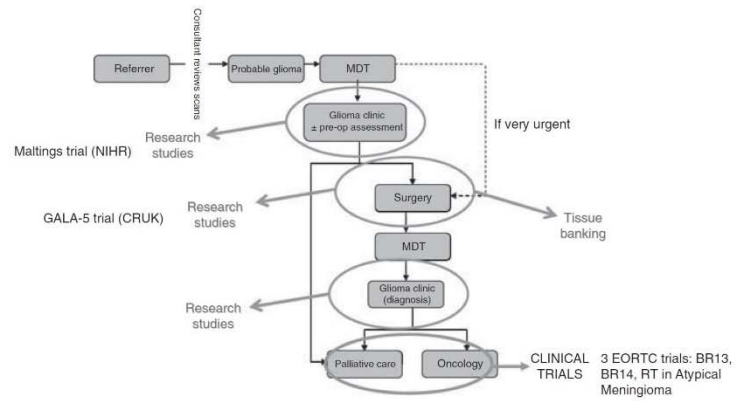

**Figure 5** Service reconfiguration supports research for patient benefit. Our ability to interrogate each stage of the patient journey with an array of screening, diagnostic and analytical tools is unique. This results in a highly integrated research infrastructure capable of delivering tangible results evidenced by the number of clinical studies into which we are recruiting patients. NB: RT in Meningioma, MALTINGS and GALA-5 are all led by Cambridge PIs.
